# Supplementary material for: Functional and Genetic Analyses Unveil the Implication of CDC27 in Hemifacial Microsomia
Source: MDPI journal article supplement (doi:10.3390/ijms25094707), 2024-04-26
Supplement: s1 [file s1]

**Table S2.** Probe primers of *in situ* hybridization

| Primers              | Sequence (5'→3')                             |
|----------------------|----------------------------------------------|
| <i>cdc27</i> -F      | GAGCCCTGGTGTGTAGTTGG                         |
| <i>cdc27</i> -R      | GATTCCTCCACCTCCGTTGA                         |
| <i>cdc27</i> -T7 R   | TAATACGACTCACTATAGGGGATTCCTCCACCTCCGTTGA     |
| <i>crestin</i> -F    | GAGAAGCCCTCATCAGAGAGTTTG                     |
| <i>crestin</i> -R    | GTTGCTTGTTCAGGCAGAATCAGG                     |
| <i>crestin</i> -T7 R | TAATACGACTCACTATAGGGGTTGCTTGTTCAGGCAGAATCAGG |
| <i>col2a1a</i> -F    | TCTGAAGTCCATCAACGGGC                         |
| <i>col2a1a</i> -R    | TTTTCCGTCACGCTAAACGC                         |
| <i>col2a1a</i> -T7 R | TAATACGACTCACTATAGGGGTTTTCCGTCACGCTAAACGC    |
| <i>sox9a</i> -F      | CCTCGACCCCTACCTGAAGA                         |
| <i>sox9a</i> -R      | GGCGGGAGGTATTGGTCAAA                         |
| <i>sox9a</i> -T7 R   | TAATACGACTCACTATAGGGGGCGGGAGGTATTGGTCAAA     |
| <i>barx1</i> -F      | CTGGGCGGATCAGACTTCTC                         |
| <i>barx1</i> -R      | GCTTCTCGTGTCTCTCCTG                          |
| <i>barx1</i> -T7 R   | TAATACGACTCACTATAGGGGCTTCTCGTGTCTCTCCTG      |
| <i>dlx2a</i> -F      | CACAGTTCTGCTTTGCGTCG                         |
| <i>dlx2a</i> -R      | CCCAAGTCGGCAGAGTCAAA                         |
| <i>dlx2a</i> -T7 R   | TAATACGACTCACTATAGGGCCCAAGTCGGCAGAGTCAAA     |
| <i>foxd3</i> -F      | CCTACTCGTACATCGCCCTC                         |
| <i>foxd3</i> -R      | CCGGGTAAAGGACAGGGAC                          |
| <i>foxd3</i> -T7 R   | TAATACGACTCACTATAGGGCCGGGTAAAGGACAGGGAC      |
| <i>nkx2.3</i> -F     | TCGTGTTTTCTCGGAGGTGG                         |
| <i>nkx2.3</i> -R     | GCGCATTAGTGGACGTGTTC                         |
| <i>nkx2.3</i> -T7-R  | TAATACGACTCACTATAGGGGCGCATTAGTGGACGTGTTC     |
| <i>fgf3</i> -F       | GAATCTCTGGCTCCGAGGCT                         |
| <i>fgf3</i> -R       | GCCGCTGACTCTCTCTAAGC                         |
| <i>fgf3</i> -T7-R    | TAATACGACTCACTATAGGGGCCGCTGACTCTCTCTAAGC     |
| <i>tbx1</i> -F       | GCAGCTGTCCCATTTTTGCG                         |
| <i>tbx1</i> -R       | ACGGCGGTAAATCTGGTCTC                         |
| <i>tbx1</i> -T7-R    | TAATACGACTCACTATAGGGACGGCGGTAAATCTGGTCTC     |
