# Supplementary material for: Functional and Genetic Analyses Unveil the Implication of CDC27 in Hemifacial Microsomia
Source: MDPI journal article supplement (doi:10.3390/ijms25094707), 2024-04-26
Supplement: s1 [file s1]

**Table S3.** Primers of qRT-PCR

| <b>Primers</b>     | <b>Sequence (5'→3')</b> |
|--------------------|-------------------------|
| <i>gapdh</i> -F    | GGGTGATGCAGGTGCTACTT    |
| <i>gapdh</i> -R    | AAAGGAGCCAGGCAGTTGG     |
| <i>cdc27</i> -F    | AGGCTCTATGCTGAGGTCCA    |
| <i>cdc27</i> -R    | TCCTCCGGTCAGGATCTGTT    |
| <i>tp53</i> -F     | GTGGCTCTTGCTGGGACATC    |
| <i>tp53</i> -R     | CAGGTCCGGTGAATAAGTGCAA  |
| <i>cdkn1a</i> -F   | GAGCTTCGACTTTGCGTCTG    |
| <i>cdkn1a</i> -R   | CTTGGCTTGGTAGAAATCTGTG  |
| <i>gadd45aa</i> -F | GACCCTGATAACGTGGTGCT    |
| <i>gadd45aa</i> -R | GCATGTGGAACCGTGACCA     |
| <i>ccng1</i> -F    | CGATACACTGCAAGCTGAAACTG |
| <i>ccng1</i> -R    | GCTGGAAGAGGTCGTGATTGA   |
| <i>serpine1</i> -F | GGTGCATTGCTCTTTAGCGG    |
| <i>serpine1</i> -R | GGCAGTCCAAGCTATGCTGA    |
| <i>sox9a</i> -F    | TTTGACCAATACCTCCCGCC    |
| <i>sox9a</i> -R    | AGGAACCGTAGCTGATGTGC    |
| <i>col2a1a</i> -F  | TGACCAGGAAGAGTTTGGCG    |
| <i>col2a1a</i> -R  | TTTGCACCAAGTGACCCGAT    |
