# Supplementary material for: Functional and Genetic Analyses Unveil the Implication of CDC27 in Hemifacial Microsomia
Source: MDPI journal article supplement (doi:10.3390/ijms25094707), 2024-04-26
Supplement: s1 [file s1]

**Table S1.** The gRNAs and related primer sequences

| Primers                             | Sequence (5'→3')                                                        |
|-------------------------------------|-------------------------------------------------------------------------|
| T7- <i>cdc27</i> (Exon-1)-sfd       | <u>TAATACGACTCACTATA</u> GGAGCCTGGCTACGGAAT<br>GA GTTTTAGAGCTAGAAATAGC  |
| T7- <i>cdc27</i> (Exon-7)-sfd       | <u>TAATACGACTCACTATA</u> gACTGTGACCATAACTCT<br>GC GTTTTAGAGCTAGAAATAGC  |
| T7- <i>cdc27</i> (Exon-13)-sfd      | <u>TAATACGACTCACTATA</u> gTCGATAGCTCTCTATACG<br>T GTTTTAGAGCTAGAAATAGC  |
| T7- <i>cdc27</i> (Exon-18)-sfd      | <u>TAATACGACTCACTATA</u> GGATAGTCATCAGGAGTG<br>AC GTTTTAGAGCTAGAAATAGC  |
| T7- <i>cdkn1a</i> (Exon-2-1)-sfd    | <u>TAATACGACTCACTATA</u> GCCCATTACCGAGTGAAC<br>GT GTTTTAGAGCTAGAAATAGC  |
| T7- <i>cdkn1a</i> (Exon-2-2)-sfd    | <u>TAATACGACTCACTATA</u> GGGCGGAGACTTCCACT<br>GGGAGTTT TAGAGCTAGAAATAGC |
| T7- <i>cdkn1a</i> (Exon-2-3)-sfd    | <u>TAATACGACTCACTATA</u> GGGGGTTTCTCCACTTC<br>ATG GTTTTAGAGCTAGAAATAGC  |
| T7- <i>cdkn1a</i> (Exon-3)-sfd      | <u>TAATACGACTCACTATA</u> gGCTACTGGCCGGATTT<br>GCG GTTTTAGAGCTAGAAATAGC  |
| T7- <i>tp53</i> (Exon-2)-sfd        | <u>TAATACGACTCACTATA</u> GGCTCGAACCACGGAGC<br>CCTG GTTTTAGAGCTAGAAATAGC |
| tracr rev                           | AAAAAAAGCACCGACTCGGTGCCAC                                               |
| <i>cdc27</i> (Exon-1)-Forward       | CTATTTGAATCGGTTGTGTTTCG                                                 |
| <i>cdc27</i> (Exon-1)-Reverse       | GTCTTCTACCGTAACTGCGACC                                                  |
| <i>cdc27</i> (Exon-7)- Forward      | GGTGTAGTTTTGGAATTTTGCC                                                  |
| <i>cdc27</i> (Exon-7)- Reverse      | ATAACCGCAGATTCTGTCTTGG                                                  |
| <i>cdc27</i> (Exon-13)- Forward     | GGTGAAATCAATTACCAAAGGC                                                  |
| <i>cdc27</i> (Exon-13)- Reverse     | TTTTGTCCATGTCAGTGAGGTC                                                  |
| <i>cdc27</i> (Exon-18)- Forward     | CTCCTGAATCAAATGTTCGTCA                                                  |
| <i>cdc27</i> (Exon-18)- Reverse     | CAACAAACAGCATTACACCGAG                                                  |
| <i>cdkn1a</i> (Exon-2-1,2)- Forward | ACCCCTAAAACTGTCATCGCTA                                                  |
| <i>cdkn1a</i> (Exon-2-1,2)- Reverse | ACCTGTGATGTTGGTCTGTTTG                                                  |
| <i>cdkn1a</i> (Exon-2-3)- Forward   | TTGCGTCTGAGAAACCACTAGA                                                  |
| <i>cdkn1a</i> (Exon-2-3)- Reverse   | TGAAGGTAGATGCAGGTCAAGA                                                  |
| <i>cdkn1a</i> (Exon-3)- Forward     | ACAGACCAACATCACAGGTCAG                                                  |
| <i>cdkn1a</i> (Exon-3)- Reverse     | AGGAATGGATCTTTCCAGAACA                                                  |
| <i>tp53</i> (Exon-2)- Forward       | GGCCATTGTCATTTTTCGTATT                                                  |
| <i>tp53</i> (Exon-2)- Reverse       | AATTACACACACTTGCCTCCCT                                                  |

**Note:** The black underline indicates the T7 promoter sequence; The blue sequence indicates the main sequence of the target (excluding PAM); The red sequence indicates the fixed sequence of gRNA scaffold; The “g” refers to the adjustment for the first base of the main sequence is not “g”.
